## Mitophagy in yeast is independent of mitochondrial fission and requires the stress response gene *WHI2*

Nadine Mendl, Angelo Occhipinti, Matthias Müller, Philipp Wild, Ivan Dikic and Andreas S. Reichert

*Journal of Cell Science* 124, 3525  
© 2011. Published by The Company of Biologists Ltd  
doi:10.1242/jcs.100990

There was an error published in *J. Cell Sci.* **124**, 1339-1350.

A funding source was accidentally omitted from the acknowledgements. The acknowledgements paragraph should read as follows:

We are grateful to Stephane Duvezin-Caubet, Michael Zick, Kai Hell and Walter Neupert for inspiring scientific discussions, and Christiane Kotthoff and Christian Bach for excellent technical assistance. We thank J. Nunnari, H. Abeliovich, S. Jakobs, K. Okamoto and J. M. Hardwick for kindly providing strains, plasmids and antibodies. This work was supported by the Deutsche Forschungsgemeinschaft DFG project no. RE-1575/1-1 (to A.R. and A.O.), BMBF project GerontoMitoSys (to A.R.), Cluster of Excellence 'Macromolecular Complexes' at the Goethe University Frankfurt DFG project EXC 115 (to A.R.) and the SFB 594 (to A.R. and N.M.).

The authors apologise for this mistake.
